# Supplementary material for: Mechanisms of Resistance to Folate Pathway Inhibitors in Burkholderia pseudomallei: Deviation from the Norm
Source: PubMed Central journal article supplement (PMC5587915; doi:10.1128/mbio.01357-17), 2017-09-05
Supplement: mbo004173469sf1.pdf [file mbo004173469sf1.pdf]

**Figure S1. *folM* gene and protein mutations in laboratory selected Bp82 and clinical SXT resistant isolates.**

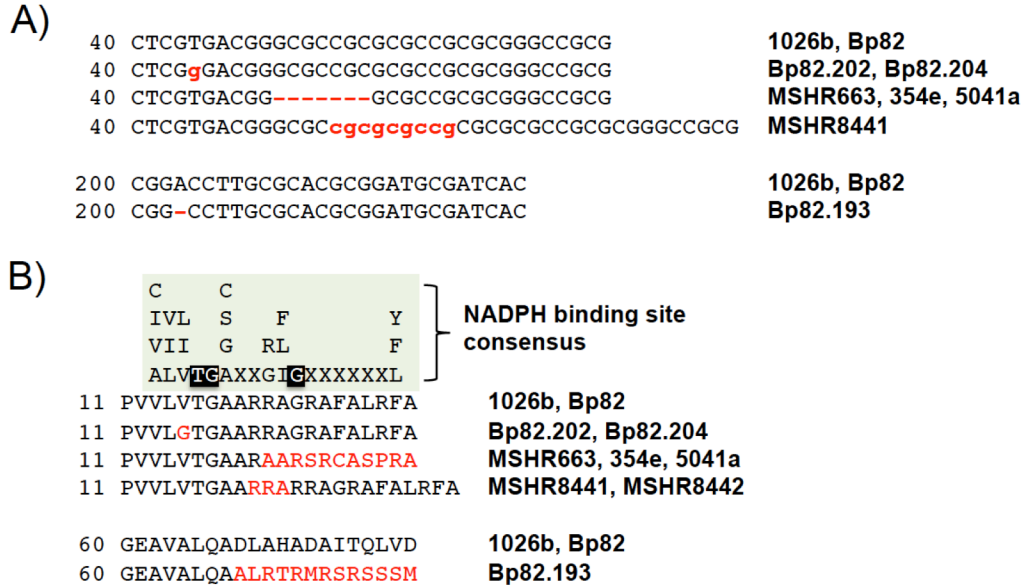

**A)** Mutations in *folM* affecting the integrity of the 267 amino acid FolM protein. Point, deletion and insertion mutations indicated by a single red letter, dashes and letters, respectively. **B)** Amino acid changes (red letters) caused by the *folM* mutations shown in panel A. The top line in panel A shows the wild-type *folM* sequences found in 1026b and its select agent excluded derivative Bp82. Bp82.202 and Bp82.204 are laboratory selected SXT<sup>r</sup> derivatives of Bp82 with a T to G change at nucleotide 44 that causes a threonine to glycine change at position 15 of FolM. Bp82.193 is laboratory selected SXT<sup>r</sup> derivative of Bp82 with a single nucleotide deletion at position 203 in *folM* that causes a frame shift after amino acid 67 of FolM. Strains MSHR663, 354e and 5041a are clinical isolates with identical 7 bp deletions after nucleotide 49 of *folM*. In all three strains, the 7 bp insertion leads to an identical frame shift after amino acid 20 of FolM and synthesis of a prematurely terminated 90 amino acid protein. Lastly, clinical isolates MSHR8441 and MSHR8442 contain a 9 bp nucleotide insertion after *folM* nucleotide 53. This results in a duplication of amino acids 20-22 and synthesis of a 270 amino acid FolM protein. In all instances but one (Bp82.193) the mutations affect the integrity of the predicted NADPH-binding site consensus indicated in the green box at the top. The white letters in the black boxes indicate invariant T and G NADPH-binding site residues (Hua et al. 2014. Sci Rep 4:doi:10.1038/srep06471).
