# Supplementary material for: Mechanisms of Resistance to Folate Pathway Inhibitors in Burkholderia pseudomallei: Deviation from the Norm
Source: PubMed Central journal article supplement (PMC5587915; doi:10.1128/mbio.01357-17), 2017-09-05
Supplement: mbo004173469sf2.pdf [file mbo004173469sf2.pdf]

1 **Figure S2. Clinical and laboratory strains containing chromosomal *bpeS*<sub>P29S</sub> express high-**  
2 **levels of *bpeF*.**

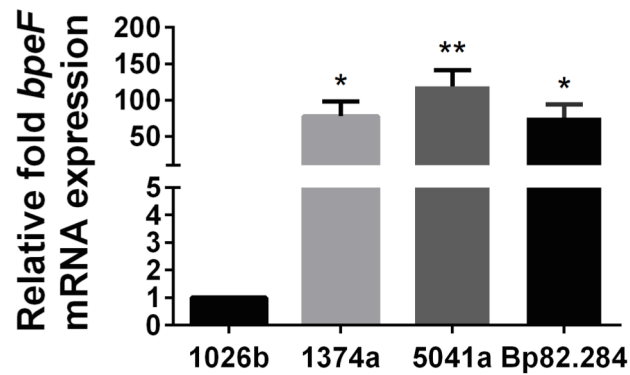

16 Total RNA was isolated from cells of the indicated strains grown to mid-log phase in LB  
17 medium. The expression of *bpeF* was measured by RT-qPCR and one-way ANOVA was  
18 performed with Dunnet's post-test to determine statistical significance compared to the 1026b  
19 control. Bars represent mean expression of at least two biological replicates with one standard  
20 deviation. The data show that presence of *bpeS*<sub>P29S</sub> allele caused *bpeF* over-expression.  
21 (\*\*,  $p < 0.01$ ; \*,  $p \leq 0.05$ ).
