# Supplementary material for: Mechanisms of Resistance to Folate Pathway Inhibitors in Burkholderia pseudomallei: Deviation from the Norm
Source: PubMed Central journal article supplement (PMC5587915; doi:10.1128/mbio.01357-17), 2017-09-05
Supplement: mbo004173469st1.pdf [file mbo004173469st1.pdf]

**Table S1. *Burkholderia pseudomallei* strains used in this study**

| Strain                                                                                                       | Description and relevant genotypes <sup>1</sup>                              | Reference  |
|--------------------------------------------------------------------------------------------------------------|------------------------------------------------------------------------------|------------|
| Bp82                                                                                                         | <i>B. pseudomallei</i> attenuated and select agent excluded prototype strain | (1)        |
| <b>Bp82-derived TMP<sup>r</sup> selected mutants</b>                                                         |                                                                              |            |
| Bp82.102                                                                                                     | Bp82 <i>bpeT</i> <sub>L265R</sub>                                            | This study |
| Bp82.103                                                                                                     | Bp82 <i>bpeT</i> <sub>C310R</sub> <i>folA</i> <sub>F158V</sub>               | This study |
| Bp82.104                                                                                                     | Bp82 <i>folA</i> <sub>I99L</sub>                                             | This study |
| <b>Bp82-derived TMP<sup>r</sup> reconstructed mutants</b>                                                    |                                                                              |            |
| Bp82.183                                                                                                     | Bp82 <i>folA</i> <sub>F158V</sub>                                            | This study |
| Bp82.184                                                                                                     | Bp82 <i>folA</i> <sub>I99L</sub>                                             | This study |
| Bp82.268                                                                                                     | Bp82 <i>bpeT</i> <sub>C310R</sub>                                            | This study |
| Bp82.269                                                                                                     | Bp82 <i>bpeT</i> <sub>L265R</sub>                                            | This study |
| <b>Bp82-derived SXT<sup>r</sup> selected mutants</b>                                                         |                                                                              |            |
| Bp82.191                                                                                                     | Bp82 <i>bpeS</i> <sub>K267T</sub> <i>folM</i> <sub>V15G</sub>                | This study |
| Bp82.193                                                                                                     | Bp82 <i>bpeS</i> <sub>K267T</sub> <i>folM</i> <sub>ΔA203</sub>               | This study |
| Bp82.199                                                                                                     | Bp82 <i>bpeS</i> <sub>K267T</sub> <i>folM</i> <sub>V15G</sub>                | This study |
| Bp82.202                                                                                                     | Bp82 <i>bpeS</i> <sub>K267T</sub> <i>folM</i> <sub>V15G</sub>                | This study |
| Bp.82.204                                                                                                    | Bp82 <i>bpeS</i> <sub>K267T</sub> <i>folM</i> <sub>V15G</sub>                | This study |
| Bp82.207                                                                                                     | Bp82 <i>bpeS</i> <sub>K267T</sub> <i>folM</i> <sub>V15G</sub>                | This study |
| <b>Repair of <i>folM</i><sub>V15G</sub> and <i>bpeS</i><sub>K267T</sub> SNPs in SXT<sup>r</sup> isolates</b> |                                                                              |            |
| Bp82.246                                                                                                     | Bp82.202 <i>folM</i> <sub>V15G</sub> <i>bpeS</i> <sub>WT</sub>               | This study |
| Bp82.247                                                                                                     | Bp82.202 <i>folM</i> <sub>WT</sub> <i>bpeS</i> <sub>K267T</sub>              | This study |
| Bp82.248                                                                                                     | Bp82.202 <i>folM</i> <sub>WT</sub> <i>bpeS</i> <sub>WT</sub>                 | This study |
| Bp82.249                                                                                                     | Bp82.204 <i>folM</i> <sub>V15G</sub> <i>bpeS</i> <sub>WT</sub>               | This study |
| Bp82.250                                                                                                     | Bp82.204 <i>folM</i> <sub>WT</sub> <i>bpeS</i> <sub>K267T</sub>              | This study |
| Bp82.251                                                                                                     | Bp82.204 <i>folM</i> <sub>WT</sub> <i>bpeS</i> <sub>WT</sub>                 | This study |
| <b>Bp82 with <i>bpeS</i> point mutations</b>                                                                 |                                                                              |            |
| Bp82.284                                                                                                     | <i>bpeS</i> <sub>P29S</sub>                                                  | This study |
| Bp82.285                                                                                                     | <i>bpeS</i> <sub>K267T</sub>                                                 | This study |
| <b>Deletion of <i>folM</i>, <i>bpeT</i> and <i>bpeS</i> in Bp82</b>                                          |                                                                              |            |
| Bp82.262                                                                                                     | Bp82 $\Delta$ <i>folM</i>                                                    | This study |
| Bp82.264                                                                                                     | Bp82 $\Delta$ <i>bpeS</i>                                                    | This study |
| Bp82.286                                                                                                     | Bp82.264 $\Delta$ <i>bpeT</i> <sub>572</sub> <sup>2</sup>                    | This study |
| <b>Constructed efflux mutants</b>                                                                            |                                                                              |            |
| Bp82.253                                                                                                     | Bp82 $\Delta$ <i>bpeT</i> <sub>1008</sub> <sup>2</sup>                       | This study |
| Bp82.27                                                                                                      | Bp82 $\Delta$ ( <i>amrAB-oprA</i> )                                          | This study |
| Bp82.57                                                                                                      | Bp82.27 $\Delta$ ( <i>bpeAB-oprB</i> )                                       | This study |
| Bp82.87                                                                                                      | Bp82.57 $\Delta$ <i>bpeT</i> <sub>572</sub> <sup>2</sup>                     | This study |

**Table S1 (Continued)**

| <b>Strain</b>                                    | <b>Description and relevant genotypes<sup>1</sup></b>                    | <b>Reference</b>      |
|--------------------------------------------------|--------------------------------------------------------------------------|-----------------------|
| <b>Bp82 BpeT and BpeS overexpressing strains</b> |                                                                          |                       |
| Bp82.187                                         | Bp82.87::mini-Tn7T-Gm- <i>PI-bpeT</i>                                    | This study            |
| Bp82.189                                         | Bp82.87::mini-Tn7T-Gm                                                    | This Study            |
| Bp82.323                                         | Bp82.264::mini-Tn7T-Km                                                   | This Study            |
| Bp82.324                                         | Bp82.286::mini-Tn7T-Km                                                   | This Study            |
| Bp82.288                                         | Bp82.286::mini-Tn7T-Km- <i>PI-bpeS</i>                                   | This Study            |
| Bp82.289                                         | Bp82.264::mini-Tn7T-Km- <i>PI-bpeS</i>                                   | This Study            |
| Bp82.310                                         | Bp82.264::mini-Tn7T-Km- <i>PI-bpeS</i> <sub>P29S</sub>                   | This study            |
| Bp82.311                                         | Bp82.286::mini-Tn7T-Km- <i>PI-bpeS</i> <sub>P29S</sub>                   | This study            |
| Bp82.320                                         | Bp82.264::mini-Tn7T-Km- <i>PI-bpeS</i> <sub>K267T</sub>                  | This Study            |
| Bp82.321                                         | Bp82.286::mini-Tn7T-Km- <i>PI-bpeS</i> <sub>K267T</sub>                  | This Study            |
| <b>SXT resistant clinical isolates</b>           |                                                                          |                       |
| MSHR663                                          | Relapse isolate of MSHR664, Australia, October 1998                      | (2)                   |
| MSHR664                                          | Pneumonia blood culture, Australia, March 1998                           | Menzies<br>Collection |
| MSHR8441                                         | Cystic fibrosis isolate, Australia, 2010                                 | (3)                   |
| MSHR8442                                         | Cystic fibrosis isolate, Australia, isolated 14 months<br>after MSHR8441 | (3)                   |
| 354b                                             | Sputum isolate, Thailand, 1988                                           | (4)                   |
| 354e                                             | Relapse sputum isolate, Thailand, 1994                                   | (4)                   |
| 5041a                                            | Sputum isolate, Ubon Thailand, 2008                                      | Mahidol<br>Collection |
| 1374a                                            | Pus isolate, Ubon Thailand, 1995                                         | (5, 6)                |
| Bp1651                                           | Cystic fibrosis isolate, USA                                             | (7)                   |
| <b>Antibiotic susceptible clinical isolate</b>   |                                                                          |                       |
| 1026b                                            | Blood isolate, Thailand, 1993                                            | (4)                   |

<sup>1</sup>**Abbreviations:** *FRT*, Flp recombinase target site; Gm, gentamicin resistance determinant; Km, kanamycin resistance determinant; <sup>r</sup>, resistant; SNP, single nucleotide polymorphism; SXT, co-trimoxazole (trimethoprim:sulfamethoxazole, 1:19); TMP, trimethoprim; WT, wild-type Bp82 sequence.

<sup>2</sup>Suffixes 572 and 1008 indicate an internal 572 bp *bpeT* deletion and a 1,008 bp complete *bpeT* deletion, respectively.

## References

1. Propst KL, Mima T, Choi KH, Dow SW, Schweizer HP. 2010. A *Burkholderia pseudomallei*  $\Delta$ *purM* mutant is avirulent in immune competent and immune deficient animals: candidate strain for exclusion from Select Agent lists. *Infect Immun* **78**:3136-3143.
2. Sarovich DS, Ward L, Price EP, Mayo M, Pitman MC, Baird RW, Currie BJ. 2014. Recurrent melioidosis in the Darwin Prospective Melioidosis Study: improving therapies mean that relapse cases are now rare. *J Clin Microbiol* **52**:650-653.

3. **Viberg LT, Sarovich DS, Kidd TJ, Geake JB, Bell SC, Currie BJ, Price EP.** 2017. Within-host evolution of *Burkholderia pseudomallei* during chronic infection of seven Australasian cystic fibrosis patients. *mBio* **8**:e00356-17. DOI:10.1128/mBio.00356-17.
4. **Hayden HS, Lim R, Brittnacher MJ, Sims EH, Ramage ER, Fong C, Wu Z, Crist E, Chang J, Zhou Y, Radey M, Rohmer L, Haugen E, Gillett W, Wuthiekanun V, Peacock SJ, Kaul R, Miller SI, Manoil C, Jacobs MA.** 2012. Evolution of *Burkholderia pseudomallei* in recurrent melioidosis. *PLoS One* **7**:e36507. DOI:10.1371/journal.pone.0036507.
5. **Dance DA, Davong V, Soeng S, Phetsouvanh R, Newton PN, Turner P.** 2014. Trimethoprim/sulfamethoxazole resistance in *Burkholderia pseudomallei*. *Int J Antimicrob Agents* **44**:368-369.
6. **Saiprom N, Amornchai P, Wuthiekanun V, Day NP, Limmathurotsakul D, Peacock SJ, Chantratita N.** 2015. Trimethoprim/sulfamethoxazole resistance in clinical isolates of *Burkholderia pseudomallei* from Thailand. *Int J Antimicrob Agents* **45**:557-559.
7. **Bugrysheva JV, Sue D, Gee JE, Elrod MG, Hoffmaster AR, Randall LB, Chirakul S, Tuanyok A, Schweizer HP, Weigel LM.** 2017. Antibiotic resistance markers in strain Bp1651 of *Burkholderia pseudomallei* Identified by genome sequence analysis. *Antimicrob Agents Chemother.* **61**:e00010-17. DOI:10.1128/AAC.00010-17.
