# Supplementary material for: Mechanisms of Resistance to Folate Pathway Inhibitors in Burkholderia pseudomallei: Deviation from the Norm
Source: PubMed Central journal article supplement (PMC5587915; doi:10.1128/mbio.01357-17), 2017-09-05
Supplement: mbo004173469st2.pdf [file mbo004173469st2.pdf]

**Table S2. Antimicrobial susceptibilities resulting from BpeT and BpeS overexpression**

| Strain and Relevant Genotype <sup>1</sup>          | Minimum Inhibitory Concentration (µg/ml) |                  |       |
|----------------------------------------------------|------------------------------------------|------------------|-------|
|                                                    | TMP <sup>2</sup>                         | SMX <sup>2</sup> | SXT   |
| Bp82                                               | 0.75                                     | 4                | 0.094 |
| Bp82.189 $\Delta bpeT$ <sup>3</sup>                | 1                                        | 8                | 0.094 |
| Bp82.187 $\Delta bpeT PI-bpeT$                     | 16                                       | 128              | 1     |
| Bp82.289 $\Delta bpeS PI-bpeS_{WT}$                | 0.75                                     | 6                | 0.094 |
| Bp82.288 $\Delta bpeS \Delta bpeT PI-bpeS_{WT}$    | 0.38                                     | 4                | 0.125 |
| Bp82.320 $\Delta bpeS PI-bpeS_{K267T}$             | ≥ 32                                     | ≥ 1024           | 6     |
| Bp82.321 $\Delta bpeS \Delta bpeT PI-bpeS_{K267T}$ | ≥ 32                                     | ≥ 1024           | 6     |
| Bp82.310 $\Delta bpeS PI-bpeS_{P29S}$              | ≥ 32                                     | ≥ 1024           | 6     |
| Bp82.311 $\Delta bpeS \Delta bpeT PI-bpeS_{P29S}$  | ≥ 32                                     | ≥ 1024           | 6     |

<sup>1</sup>All strains are based on Bp82 except Bp82.187 and Bp82.189, which are derived from  $\Delta(amrAB-oprA) \Delta(bpeAB-oprB)$  strain Bp82.87 (**Supplementary Table S1**). Bp82.87 was employed to enable selection for the gentamicin resistance marker contained of the mini-Tn7 element used for chromosomal integration of the *PI-bpeT* construct.

<sup>2</sup>The detection limit for the Etest<sup>®</sup> assay is 32 µg/ml for Tmp and 1024 µg/ml for SMX.

<sup>3</sup>Empty vector control.
