# Supplementary material for: Mechanisms of Resistance to Folate Pathway Inhibitors in Burkholderia pseudomallei: Deviation from the Norm
Source: PubMed Central journal article supplement (PMC5587915; doi:10.1128/mbio.01357-17), 2017-09-05
Supplement: mbo004173469st3.pdf [file mbo004173469st3.pdf]

**Table S3. The BpeEF-OprC efflux pump is required for increased folate inhibitor resistance in laboratory strains and clinical isolates.**

| Strain   | Minimal Inhibitory Concentration ( $\mu\text{g/ml}$ ) |                  |     |                                |     |       |                                                                                               |     |       |                                                                                                                           |     |      |
|----------|-------------------------------------------------------|------------------|-----|--------------------------------|-----|-------|-----------------------------------------------------------------------------------------------|-----|-------|---------------------------------------------------------------------------------------------------------------------------|-----|------|
|          | <i>bpeE<sup>+</sup>F<sup>+</sup>-oprC<sup>+</sup></i> |                  |     | $\Delta$ ( <i>bpeEF-oprC</i> ) |     |       | $\Delta$ ( <i>bpeEF-oprC</i> ::<br>mini-Tn7T- <i>P<sub>tac</sub></i> -<br><i>bpeEF-oprC</i> ) |     |       | $\Delta$ ( <i>bpeEF-oprC</i> ::<br>mini-Tn7T- <i>P<sub>tac</sub></i> -<br><i>bpeEF-oprC</i><br>+ 1 mM IPTG <sup>2</sup> ) |     |      |
|          | TMP <sup>1</sup>                                      | SMX <sup>1</sup> | SXT | TMP                            | SMX | SXT   | TMP                                                                                           | SMX | SXT   | TMP                                                                                                                       | SMX | SXT  |
| Bp82.191 | $\geq 32$                                             | $\geq 1024$      | 4   | 1.5                            | 8   | 0.125 | 1.5                                                                                           | 12  | 0.125 | 12                                                                                                                        | 16  | 0.5  |
| Bp82.193 | $\geq 32$                                             | $\geq 1024$      | 3   | 1.5                            | 6   | 0.094 | 1                                                                                             | 6   | 0.094 | 6                                                                                                                         | 8   | 0.5  |
| Bp82.199 | $\geq 32$                                             | $\geq 1024$      | 2   | 1.5                            | 6   | 0.125 | 1.5                                                                                           | 12  | 0.125 | 8                                                                                                                         | 24  | 0.75 |
| Bp82.202 | $\geq 32$                                             | $\geq 1024$      | 6   | 1.5                            | 6   | 0.125 | 1.5                                                                                           | 16  | 0.125 | 12                                                                                                                        | 24  | 0.5  |
| Bp82.204 | $\geq 32$                                             | $\geq 1024$      | 4   | 2                              | 8   | 0.125 | 1.5                                                                                           | 12  | 0.125 | 6                                                                                                                         | 16  | 0.5  |
| Bp82.207 | $\geq 32$                                             | $\geq 1024$      | 2   | 1.5                            | 12  | 0.125 | 1.5                                                                                           | 16  | 0.125 | 8                                                                                                                         | 24  | 0.5  |
| 1374a    | $\geq 32$                                             | $\geq 1024$      | 4   | 1.5                            | 8   | 0.125 | -                                                                                             | -   | -     | -                                                                                                                         | -   | -    |
| 5041a    | $\geq 32$                                             | $\geq 1024$      | 4   | 16                             | 16  | 0.19  | -                                                                                             | -   | -     | -                                                                                                                         | -   | -    |

<sup>1</sup> The detection limit for the Etetest<sup>®</sup> assay is 32  $\mu\text{g/ml}$  for TMP and 1024  $\mu\text{g/ml}$  for SMX.

<sup>2</sup>IPTG, isopropyl- $\beta$ -D-thiogalactopyranoside.
