# Supplementary material for: Mechanisms of Resistance to Folate Pathway Inhibitors in Burkholderia pseudomallei: Deviation from the Norm
Source: PubMed Central journal article supplement (PMC5587915; doi:10.1128/mbio.01357-17), 2017-09-05
Supplement: mbo004173469st4.pdf [file mbo004173469st4.pdf]

**Table S4. Primers used in this study.**

| <b>Primer</b>                            | <b>Sequence<sup>a,b,c</sup></b>                            | <b>Source</b> |
|------------------------------------------|------------------------------------------------------------|---------------|
| <b>Cloning /deletion/sequencing</b>      |                                                            |               |
| 1726                                     | 5'-CTCTGGATCGCCTTCTCGTA                                    | This study    |
| 1727                                     | 5'-TCAGAGCGCTTTTGAAGCTAATTCGAGATCGCGCTGAAGAACAAC           | This study    |
| 1728                                     | 5'-AGGAACTTCAAGATCCCCAATTCGGCTCTCGACCACCCAGTTCT            | This study    |
| 1729                                     | 5'-GTACGAGCGCCTATCTGGTC                                    | This study    |
| 1791                                     | 5'-CGACGCATCGCGATGGAAAC                                    | This study    |
| 1790                                     | 5'-ATGGACCGGCTGCAAGCCAT                                    | This study    |
| 1966                                     | 5'-CTTCCGGCCTCTTTTCTTTC                                    | (1)           |
| 1967                                     | 5'-GTGCTGATCGAGCAGATGAC                                    | (1)           |
| 1989                                     | 5'-GGAAGTACGCGGACTTCGC                                     | This study    |
| 1990                                     | 5'-GCATCAACCTCGGCTACACG                                    | This study    |
| 2323                                     | 5'-CCAGATCAACGACATCATGG                                    | This study    |
| 2324                                     | 5'-CGAGCATATAGCCCGATACC                                    | This study    |
| 2570                                     | 5'-GGATGACTTCGGCGCTATC                                     | This study    |
| 2571                                     | 5'-CCGTTCAACCTGACCTCAAC                                    | This study    |
| 2572                                     | 5'-GTCTTCCGCCAGCGCTAC                                      | This study    |
| 2573                                     | 5'-AAGCCGATTCATCTGGACAC                                    | This study    |
| 2575                                     | 5'-CGTCGATGCGGTCTATACG                                     | This study    |
| 2576                                     | 5'-ATCGAAGCTCGGCAGGTG                                      | This study    |
| 2577                                     | 5'-CGCGCCTACGAGGAGTTC                                      | This study    |
| 2592                                     | 5'-CTCGCTCACGCTGATTGC                                      | This study    |
| 2607                                     | 5'-CGCTCGGGATGTCGCGCGCGTGC                                 | This study    |
| 2608                                     | 5'-CGACGCGCGCGACATCCCGAGCG                                 | This study    |
| 2618                                     | 5'-CCTGAAGCAGCAACAGCAC                                     | This study    |
| 2619                                     | 5'-TCAGAGCGCTTTTGAAGCTAATTCGATATCGATAGCGCCGAAGTC           | This study    |
| 2620                                     | 5'-GACTTCGGCGCTATCGATATCGAATTAGCTTCAAAGCGCTCTGA            | This study    |
| 2621                                     | 5'-GCTTCCTTCGCTTCGATGCGAATTGGGGATCTTGAAGTACCT              | This study    |
| 2622                                     | 5'-AGGTA <del>CTT</del> CAAGATCCCCAATTCGCATCGAAGCGAAGGAAGC | This study    |
| 2623                                     | 5'-CTTTCGCGTGAACGATCC                                      | This study    |
| 2636                                     | 5'-AGCGAATAATCGACCGACAC                                    | This study    |
| 2637                                     | 5'-GATGACGGACGAGGAAAGC                                     | This study    |
| 2638                                     | 5'-CCAATATCGCGGAGGTAGAGCGGTTAGTCGCGCAGACG                  | This study    |
| 2639                                     | 5'-TCACTGCTTGCCGTCCAAGCTTAGGTGTTTCGTCAGGTTGACC             | This study    |
| 2640                                     | 5'-CGAGCCGCGACGAAG                                         | This study    |
| 2641                                     | 5'-CATCGACCACGGCACG                                        | This study    |
| 2642                                     | 5'-GGTCAACCTGACGAACACCTAAGCTTGGACGGCAAGCAGTGA              | This study    |
| 2643                                     | 5'-CGTCTGCGGACTAACCCTCTACCTCCGCGATATTGG                    | This study    |
| <b>P1 promoter expression constructs</b> |                                                            |               |
| 1563                                     | 5'-GGGATATCGAATTCACGAACCCAGTTGAC                           | This study    |
| 1789                                     | 5'-ATGGCTTGCAGCCGGTCCATGTCGAATCCTTCTTGTGAATC               | This study    |
| 1790                                     | 5'-ATGGACCGGCTGCAAGCCAT                                    | This study    |
| 1791                                     | 5'-CGACGCATCGCGATGGAAAC                                    | This study    |
| 2702                                     | 5'-AAGCTTTTGACATAAGCCTGTTCGGTTCG                           | This study    |
| 2693                                     | 5'-GGTACCTACGCGGCCACCTGC                                   | This study    |
| 2694                                     | 5'-GCATGGACCCGATTCAGGCAAT                                  | This study    |
| 2696                                     | 5'-GCGGTCCATGCCATCAATCCTTCTTGTGAATC                        | This study    |
| 2871                                     | 5'-ATGGACCGCATTCAAGCAATGGAAGTCTTC                          | This study    |

**Table S4. Continued.**

| <b>Primer</b>                       | <b>Sequence</b>           | <b>Source</b> |
|-------------------------------------|---------------------------|---------------|
| <b>Real time PCR primers</b>        |                           |               |
| Bp23S_F                             | 5'-GTAGACCCGAAACCAGGTGA   | (2)           |
| Bp23S_R                             | 5'-CACCCCTATCCACAGTCAT    | (2)           |
| 1524 ( <i>bpeF</i> )                | 5'-TCCGAGTATCCGGAAGTCGT   | (2)           |
| 1525 ( <i>bpeF</i> )                | 5'-GTCCTCGACACCGTTGATCT   | (2)           |
| 1814 ( <i>bpeT</i> )                | 5'-GAGCTTTCAGGTCAACAACC   | (1)           |
| 1815 ( <i>bpeT</i> )                | 5'-GTGAGTGGAATTCGCAGAG    | (1)           |
| 2779 ( <i>bpeS</i> )                | 5'-AAGCGCTCAGGTAATCGGG    | This study    |
| 2780 ( <i>bpeS</i> )                | 5'-GGTCGAAGAGGGGATCGATTG  | This study    |
| <b>Tn7 integration confirmation</b> |                           |               |
| Tn7L                                | 5'-ATTAGCTTACGACGCTACACCC | (3)           |
| BPGLMS1                             | 5'-GAGGAGTGGGCGTCGATCAAC  | (3)           |
| BPGLMS2                             | 5'-ACACGACGCAAGAGCGGAATC  | (3)           |
| BPGLMS3                             | 5'-CGGACAGGTTTCGCGCCATGC  | (3)           |

<sup>a</sup>Bold indicates a newly generated restriction enzyme cleavage site.

<sup>b</sup>Underline indicates a homologous splicing region.

<sup>c</sup>Italic type indicates a nucleotide change.

## References

1. **Podnecky NL, Wuthiekanun V, Peacock SJ, Schweizer HP.** 2013. The BpeEF-OprC efflux pump is responsible for widespread trimethoprim resistance in clinical and environmental *Burkholderia pseudomallei* isolates. *Antimicrob Agents Chemother* **57**:4381-4386.
2. **Kumar A, Mayo M, Trunck LA, Cheng AC, Currie BJ, Schweizer HP.** 2008. Expression of resistance-nodulation-cell division efflux pumps in commonly used *Burkholderia pseudomallei* strains and clinical isolates from Northern Australia. *Trans Roy Soc Trop Med Hyg* **102 (Suppl 1)**:S145-S151.
3. **Choi K-H, Mima T, Casart Y, Rholl D, Kumar A, Beacham IR, Schweizer HP.** 2008. Genetic tools for select agent compliant manipulation of *Burkholderia pseudomallei*. *Appl Env Microbiol* **74**:1064-1075.
