# Supplementary material for: Mechanisms of Resistance to Folate Pathway Inhibitors in Burkholderia pseudomallei: Deviation from the Norm
Source: PubMed Central journal article supplement (PMC5587915; doi:10.1128/mbio.01357-17), 2017-09-05
Supplement: mbo004173469st5.pdf [file mbo004173469st5.pdf]

**Table S5. Plasmids used in this study**

| Plasmid                                                                   | Description <sup>a</sup>                                                                                                                                                            | Source       |
|---------------------------------------------------------------------------|-------------------------------------------------------------------------------------------------------------------------------------------------------------------------------------|--------------|
| <b>Cloning and allele replacement vectors, and other utility plasmids</b> |                                                                                                                                                                                     |              |
| pGEM-T Easy                                                               | Ap <sup>r</sup> ; TA cloning vector                                                                                                                                                 | Promega      |
| pCR2.1                                                                    | Ap <sup>r</sup> , Km <sup>r</sup> ; TA cloning vector                                                                                                                               | ThermoFisher |
| pEXKm5                                                                    | Km <sup>r</sup> ; allelic-exchange plasmid                                                                                                                                          | (1)          |
| pEXGm5B                                                                   | Gm <sup>r</sup> ; allelic-exchange plasmid                                                                                                                                          | This study   |
| pFLPe2                                                                    | Ze <sup>r</sup> ; Flp recombinase expression plasmid                                                                                                                                | (2)          |
| pFLPe3                                                                    | Km <sup>r</sup> ; Flp recombinase expression plasmid                                                                                                                                | (2)          |
| pFKM2                                                                     | Ap <sup>r</sup> , Km <sup>r</sup> ; source of <i>FRT</i> -Km <sup>r</sup> - <i>FRT</i> cassette                                                                                     | (2)          |
| pFZE1                                                                     | Zeo <sup>r</sup> ; source of <i>FRT</i> - <i>ble</i> - <i>FRT</i> cassette                                                                                                          | (2)          |
| p34E-Tp1                                                                  | Ap <sup>r</sup> , Tp <sup>r</sup> ; source of P1 promoter                                                                                                                           | (3)          |
| pBADScE-T                                                                 | Ze <sup>r</sup> ; I- <i>Sce</i> I homing endonuclease expression plasmid                                                                                                            | This study   |
| pTNS3                                                                     | Ap <sup>r</sup> ; Tn7 insertion helper plasmid                                                                                                                                      | (2)          |
| pPS1464                                                                   | Ap <sup>r</sup> , Gm <sup>r</sup> ; pUC18T-mini-Tn7T-Gm                                                                                                                             | (4)          |
| pPS2280                                                                   | Ap <sup>r</sup> , Km <sup>r</sup> ; pUC18T-mini-Tn7T-Km                                                                                                                             | (2)          |
| pPS2481                                                                   | Ap <sup>r</sup> , Km <sup>r</sup> ; pUC18T-mini-Tn7T-Km- <i>P<sub>tac</sub></i>                                                                                                     | (5)          |
| <b>Plasmids for efflux pump operon deletion</b>                           |                                                                                                                                                                                     |              |
| pPS2833                                                                   | Km <sup>r</sup> ; pEXKm5 with $\Delta(amrAB-oprA)$                                                                                                                                  | This study   |
| pPS2412                                                                   | Ap <sup>r</sup> , Km <sup>r</sup> ; pGEM-T Easy with $\Delta(bpeAB-oprB)::FRT$ -Km <sup>r</sup> - <i>FRT</i>                                                                        | (6)          |
| pPS2899                                                                   | Gm <sup>r</sup> ; pEXGm5B with $\Delta(bpeAB-oprB)$                                                                                                                                 | This study   |
| pPS2591                                                                   | Km <sup>r</sup> ; pEXKm5 with $\Delta(bpeEF-oprC)$                                                                                                                                  | (7)          |
| <b>Plasmids for <i>bpeT</i> deletion</b>                                  |                                                                                                                                                                                     |              |
| pPS2565                                                                   | Ap <sup>r</sup> , Km <sup>r</sup> ; pCR2.1 with <i>bpeT</i> amplified with primers 1790 + 1791                                                                                      | This study   |
| pPS2567                                                                   | Ap <sup>r</sup> , Km <sup>r</sup> ; Ze <sup>r</sup> ; pCR2.1 $\Delta bpeT$ ( <i>FRT</i> - <i>ble</i> - <i>FRT</i> between <i>bpeT</i> <i>Sal</i> I sites)                           | This study   |
| pPS2571                                                                   | Km <sup>r</sup> ; Ze <sup>r</sup> ; pEXKm5 with $\Delta bpeT::FRT$ - <i>ble</i> - <i>FRT</i> from pPS2567                                                                           | This study   |
| pPS2647                                                                   | Km <sup>r</sup> ; pEXKm5 with $\Delta bpeT$                                                                                                                                         | This study   |
| <b>Plasmids for <i>bpeS</i> deletion</b>                                  |                                                                                                                                                                                     |              |
| pPS3127                                                                   | Ap <sup>r</sup> , Km <sup>r</sup> ; pGEM-T Easy with $\Delta bpeS::FRT$ -Km <sup>r</sup> - <i>FRT</i>                                                                               | This study   |
| pPS3158                                                                   | Ap <sup>r</sup> , Gm <sup>r</sup> ; pEXGm5B with $\Delta bpeS::FRT$ -Km <sup>r</sup> - <i>FRT</i>                                                                                   | This study   |
| <b>Plasmids for introduction of <i>folA</i> point mutations into Bp82</b> |                                                                                                                                                                                     |              |
| pPS2552                                                                   | Ap <sup>r</sup> ; pGEM-T Easy with <i>folA</i> <sub>199L</sub> on 694 bp PCR fragment from Bp82.104                                                                                 | This study   |
| pPS2960                                                                   | Km <sup>r</sup> ; pEXKm5 with <i>folA</i> <sub>199L</sub> containing <i>Eco</i> RI fragment from pPS2952                                                                            | This study   |
| pPS2951                                                                   | Ap <sup>r</sup> ; pGEM-T Easy with <i>folA</i> <sub>F158V</sub> on 694 bp PCR fragment from Bp82.102                                                                                | This study   |
| pPS2959                                                                   | Km <sup>r</sup> ; pEXKm5 with <i>folA</i> <sub>F158V</sub> containing <i>Eco</i> RI fragment from pPS2951                                                                           | This study   |
| <b>Plasmids for introduction of <i>bpeT</i> point mutations into Bp82</b> |                                                                                                                                                                                     |              |
| pPS3167                                                                   | Ap <sup>r</sup> ; pGEM-T Easy with <i>bpeT</i> <sub>L265R</sub> on 2,026 bp PCR fragment from Bp82.103                                                                              | This study   |
| pPS3168                                                                   | Ap <sup>r</sup> ; pGEM-T Easy with <i>bpeT</i> <sub>C310R</sub> on 2,026 bp PCR fragment from Bp82.102                                                                              | This study   |
| pPS3177                                                                   | Km <sup>r</sup> ; pEXKm5 with <i>bpeT</i> <sub>C310R</sub> on 2,477 bp <i>Pvu</i> II fragment from pPS3168                                                                          | This study   |
| pPS3178                                                                   | Km <sup>r</sup> ; pEXKm5 with <i>bpeT</i> <sub>L265R</sub> on 2,477 bp <i>Pvu</i> II fragment from pPS3167                                                                          | This study   |
| <b>Plasmids for introduction of <i>bpeS</i> point mutations into Bp82</b> |                                                                                                                                                                                     |              |
| pPS3097                                                                   | Ap <sup>r</sup> ; pGEM-T Easy with WT <i>bpeS</i> on 1,456 bp PCR fragment from Bp82                                                                                                | This study   |
| pPS3098                                                                   | Ap <sup>r</sup> ; pGEM-T Easy with <i>bpeS</i> <sub>K627T</sub> on 1,456 bp PCR fragment from Bp82.104                                                                              | This study   |
| pPS3106                                                                   | Apr; pPS3106 with <i>bpeS</i> <sub>P29S</sub> mutation introduced by mutagenic PCR                                                                                                  | This study   |
| pPS3180                                                                   | Ap <sup>r</sup> ; pGEM-T Easy with WT <i>bpeS</i> region of 2,542 bp PCR fragment from Bp82                                                                                         | This study   |
| pPS3186                                                                   | Ap <sup>r</sup> ; pPS3180 <i>Eco</i> RV+ <i>Xma</i> I <i>bpeS</i> fragment replaced with <i>bpeS</i> <sub>P29S</sub> on the same <i>Eco</i> RV+ <i>Xma</i> I fragment from pPS3106  | This study   |
| pPS3187                                                                   | Ap <sup>r</sup> ; pPS3180 <i>Eco</i> RV+ <i>Xma</i> I <i>bpeS</i> fragment replaced with <i>bpeS</i> <sub>K267T</sub> on the same <i>Eco</i> RV+ <i>Xma</i> I fragment from pPS3098 | This study   |

**Table S5 (Continued)**

| Plasmid                                                                                                          | Description <sup>a</sup>                                                                                                                                                                                                                                           | Source     |
|------------------------------------------------------------------------------------------------------------------|--------------------------------------------------------------------------------------------------------------------------------------------------------------------------------------------------------------------------------------------------------------------|------------|
| pPS3189                                                                                                          | Km <sup>r</sup> ; pEXK5 with <i>NotI</i> fragment from pPS3186 containing <i>bpeS</i> <sub>P29S</sub>                                                                                                                                                              | This study |
| pPS3190                                                                                                          | Km <sup>r</sup> ; pEXK5 with <i>NotI</i> fragment from pPS3187 containing <i>bpeS</i> <sub>K267T</sub>                                                                                                                                                             | This study |
| <b>Plasmids for repair of <i>folM</i><sub>V15G</sub> mutation in Bp82.202 and Bp82.204</b>                       |                                                                                                                                                                                                                                                                    |            |
| pPS3099                                                                                                          | Ap <sup>r</sup> ; pGEM-T Easy with WT <i>folM</i> on 1,560 bp PCR fragment from Bp82                                                                                                                                                                               | This study |
| pPS3093                                                                                                          | Km <sup>r</sup> ; pEXK5 with <i>NotI</i> fragment from pPS3099 containing WT <i>folM</i>                                                                                                                                                                           | This study |
| <b>Plasmids for repair of <i>bpeS</i><sub>K267T</sub> mutation in Bp82.202 and Bp82.204</b>                      |                                                                                                                                                                                                                                                                    |            |
| pPS3097                                                                                                          | Ap <sup>r</sup> ; pGEM-T Easy with WT <i>bpeS</i> on 1,456 bp PCR fragment from Bp82                                                                                                                                                                               | This study |
| pPS3090                                                                                                          | Km <sup>r</sup> ; pEXK5 with <i>NotI</i> fragment from pPS3097 containing WT <i>bpeS</i>                                                                                                                                                                           | This study |
| <b>Plasmids for deletion of <i>folM</i></b>                                                                      |                                                                                                                                                                                                                                                                    |            |
| pPS3130                                                                                                          | Ap <sup>r</sup> ; pGEM-T Easy with 1,236 bp $\Delta$ <i>folM</i> SOEing PCR fragment                                                                                                                                                                               | This study |
| pPS3140                                                                                                          | Ap <sup>r</sup> , Km <sup>r</sup> ; pPS3130 with $\Delta$ <i>folM</i> :: <i>FRT</i> -Km <sup>r</sup> - <i>FRT</i> obtained by ligation of 1,514 bp <i>FRT</i> -Km <sup>r</sup> - <i>FRT</i> fragment from pFKM2 ligated into <i>HindIII</i> site of SOEing product | This study |
| pPS3144                                                                                                          | Gm <sup>r</sup> , Km <sup>r</sup> ; pEXG5B with $\Delta$ <i>folM</i> :: <i>FRT</i> -Km <sup>r</sup> - <i>FRT</i> containing <i>NotI</i> fragment from pPS3140                                                                                                      | This study |
| <b>Plasmids for <i>bpeT</i> and <i>bpeS</i> overexpression</b>                                                   |                                                                                                                                                                                                                                                                    |            |
| pPS2453                                                                                                          | Ap <sup>r</sup> , Km <sup>r</sup> ; pCR2.1 with 1,600 bp <i>P1-bpeT</i> SOEing PCR fragment                                                                                                                                                                        | This study |
| pPS2463                                                                                                          | Ap <sup>r</sup> ; pUC18T-mini-Tn7T-Gm- <i>P1-bpeT</i> (pPS1464 with <i>NsiI-NruI</i> fragment from pPS2453)                                                                                                                                                        | This study |
| pPS3196                                                                                                          | Ap <sup>r</sup> ; pGEM-T Easy with <i>P1-bpeS</i> SOEing PCR fragment                                                                                                                                                                                              | This study |
| pPS3198                                                                                                          | Ap <sup>r</sup> , Km <sup>r</sup> ; pUC18T-mini-Tn7T-Km- <i>P1-bpeS</i> (pPS2280 with <i>KpnI</i> + <i>HindIII</i> fragment from pPS3196)                                                                                                                          | This study |
| pPS3262                                                                                                          | Ap <sup>r</sup> ; pGEM-T Easy with 979 bp fragment containing <i>bpeS</i> <sub>K267T</sub> amplified from pPS3190                                                                                                                                                  |            |
| pPS3280                                                                                                          | Ap <sup>r</sup> , Km <sup>r</sup> ; pUC18T-mini-Tn7T-Km- <i>P1-bpeS</i> <sub>K267T</sub> (946 bp <i>AleI</i> + <i>KpnI</i> fragment of pPS3198 exchanged with the same fragment of pPS3262)                                                                        | This study |
| pPS3263                                                                                                          | Ap <sup>r</sup> ; pGEM-T Easy with 979 bp fragment containing <i>bpeS</i> <sub>P29S</sub> amplified from pPS3189                                                                                                                                                   | This study |
| pPS3269                                                                                                          | Ap <sup>r</sup> , Km <sup>r</sup> ; pUC18T-mini-Tn7T-Km- <i>P1-bpeS</i> <sub>P29S</sub> (946 bp <i>AleI</i> + <i>KpnI</i> fragment of pPS3198 exchanged with the same fragment of pPS3263)                                                                         | This study |
| <b>Plasmids for complementation of <math>\Delta</math><i>bpeT</i> and <math>\Delta</math>(<i>bpeEF-oprC</i>)</b> |                                                                                                                                                                                                                                                                    |            |
| pPS2670                                                                                                          | Ap <sup>r</sup> , Km <sup>r</sup> ; pUC18T-mini-Tn7T-Km- <i>P<sub>tac</sub>-bpeEF-oprC</i>                                                                                                                                                                         | (7)        |
| pPS2787                                                                                                          | Ap <sup>r</sup> , Km <sup>r</sup> ; pUC18T-mini-Tn7T-Km - <i>P<sub>bpeT</sub>-bpeT</i>                                                                                                                                                                             | (7)        |

<sup>a</sup>Ap, ampicillin; Gm, gentamicin; Km, kanamycin; Ze, Zeocin; <sup>r</sup>, resistant; WT, Bp82 wild-type sequence; *P1*, *P1* integron promoter; *P<sub>tac</sub>*, *E. coli trp-lac* operon hybrid promoter; *P<sub>bpeT</sub>*, native *bpeT* promoter; Promega and ThermoFisher are located in Madison WI and Waltham, MA, respectively.

## References

1. Lopez CM, Rholi DA, Trunck LA, Schweizer HP. 2009. Versatile dual-technology system for markerless allele replacement in *Burkholderia pseudomallei*. Appl Environ Microbiol **75**:6496-6503.
2. Choi K-H, Mima T, Casart Y, Rholi D, Kumar A, Beacham IR, Schweizer HP. 2008. Genetic tools for select agent compliant manipulation of *Burkholderia pseudomallei*. Appl Env Microbiol **74**:1064-1075.

3. **Deshazer D, Woods DE.** 1996. Broad-host-range cloning and cassette vectors based on the R388 trimethoprim resistance gene. *Biotechniques* **20**:762-764.
4. **Choi K-H, Gaynor JB, White KG, Lopez C, Bosio CM, Karkhoff-Schweizer RR, Schweizer HP.** 2005. A Tn7-based broad-range bacterial cloning and expression system. *Nat Methods* **2**:443-448.
5. **Rholl DA, Papp-Wallace KM, Tomaras AP, Vasil ML, Bonomo RA, Schweizer HP.** 2011. Molecular investigations of PenA-mediated beta-lactam resistance in *Burkholderia pseudomallei*. *Front Microbiol* **2**:139. DOI:10.3389/fmicb.2011.00139.
6. **Mima T, Schweizer HP.** 2010. The BpeAB-OprB efflux pump of *Burkholderia pseudomallei* 1026b does not play a role in quorum sensing, virulence factor production, or extrusion of aminoglycosides but is a broad-spectrum drug efflux system. *Antimicrob Agents Chemother* **54**:3113-3120.
7. **Podnecky NL, Wuthiekanun V, Peacock SJ, Schweizer HP.** 2013. The BpeEF-OprC efflux pump is responsible for widespread trimethoprim resistance in clinical and environmental *Burkholderia pseudomallei* isolates. *Antimicrob Agents Chemother* **57**:4381-4386.
